# Supplementary material
Source: PubMed Central journal article supplement (PMC8007112)
Supplement: NIHMS1641363-supplement-1.pdf [file NIHMS1641363-supplement-1.pdf]

## Journal of Hepatology

### CTAT methods

Tables for a “Complete, Transparent, Accurate and Timely account” (CTAT) are now mandatory for all revised submissions. The aim is to enhance the reproducibility of methods.

- Only include the parts relevant to your study
- Refer to the CTAT in the main text as ‘Supplementary CTAT Table’
- Do not add subheadings
- Add as many rows as needed to include all information
- Only include one item per row

If the CTAT form is not relevant to your study, please outline the reasons why:

|  |
|--|
|  |
|--|

#### 1.1 Antibodies

| Name                    | Citation | Supplier        | Cat no.         | Clone no. |
|-------------------------|----------|-----------------|-----------------|-----------|
| p-IRAK4                 |          | Abcam           | Ab216513        |           |
| Ly6C                    |          | Abcam           | Ab15627         | E R-MP20  |
| MPO                     |          | Invitrogen      | MA1-80878       | 2C7       |
| CYP2E1                  |          | Millipore       | AB1252          |           |
| IRAK4                   |          | Enzo            | ADI-KAP-ST206-E |           |
| IL-1 $\beta$            |          | R&D systems     | AF-401          |           |
| p-IRAK4                 |          | Cell Signalling | 11927           | D6D7      |
| IRAK1                   |          | Cell Signalling | 4359            |           |
| p-I $\kappa$ B $\alpha$ |          | Cell Signalling | 2859            | 14D4      |
| C/EBP $\beta$           |          | Cell Signalling | 3087            |           |
| p-JNK                   |          | Cell Signalling | 9251            |           |
| $\beta$ -Actin          |          | Cell Signalling | 3700            | 8H10D10   |
| GAPDH                   |          | Cell Signalling | 5174            | D16H11    |
| Caspase 3               |          | Cell Signaling  | 9665            |           |

#### 1.2 Cell lines

| Name  | Citation | Supplier | Cat no.                                    | Passage no. | Authentication test method          |
|-------|----------|----------|--------------------------------------------|-------------|-------------------------------------|
| AML12 |          | ATCC     | ATCC <sup>®</sup><br>CRL-2254 <sup>™</sup> | 4-10        | STR Profile -<br>Mycoplasma<br>test |

#### 1.3 Organisms

| Name         | Citation | Supplier | Strain  | Sex    | Age        | Overall n number |
|--------------|----------|----------|---------|--------|------------|------------------|
| Mus Musculus |          | Jackson  | C57Bl/6 | Female | 8-10 weeks | 24               |

|                              |           |                 |                |               |                   |           |
|------------------------------|-----------|-----------------|----------------|---------------|-------------------|-----------|
| <b>IRAK4 kinase-inactive</b> | <b>22</b> | <b>In-house</b> | <b>C57Bl/6</b> | <b>Female</b> | <b>8-10 weeks</b> | <b>24</b> |
|------------------------------|-----------|-----------------|----------------|---------------|-------------------|-----------|

## 1.4 Sequence based reagents

| Name                                                         | Sequence                                                                                   | Supplier          |
|--------------------------------------------------------------|--------------------------------------------------------------------------------------------|-------------------|
| M-TNF $\alpha$                                               | F-CGTCAGCCGATTTGCTATCT<br>R- CGGACTCCGCAAAGTCTAAG                                          | Invitrogen        |
| M-IL-1 $\beta$                                               | F-GCAACTGTTCCCTGAACTCAACT<br>R-ATCTTTTGGGGTCCGTCAACT                                       | Invitrogen        |
| M-IL-6                                                       | F-GAGGATACCACTCCCAACAGACC<br>R-AAGTGCATCATCGTTGTTCATACA                                    | Invitrogen        |
| M-MCP-1                                                      | F-CTCAGCCAGATGCAGTTAACGCC<br>R-GGTGCTGAAGACCTTAGGGCAGAT                                    | Invitrogen        |
| M-F4/80                                                      | F-CTTTGGCTATGGGCTTCCAGTCC<br>R-GCAAGGAGGACAGAGTTTATCGTG                                    | Invitrogen        |
| M-CRP                                                        | F-CAGACTTTTCCGCACCTTGGCTTT<br>R-AGTGGGTGGTGGTGAAGTACGATT                                   | Invitrogen        |
| M-SAA1                                                       | F-ACACCAGGATGAAGCTACTCACCA<br>R-CCCTTGAAAGCCTCGTGAACAAA                                    | Invitrogen        |
| M-Haptoglobin                                                | F-TGCCATTCATGACATGGAGG<br>R-CTCAGGATCCCAGCTGCGTA                                           | Invitrogen        |
| M-Transferrin                                                | F-TGTAGCCTTTGTGAAACACCAGA<br>R-TCGGCAGGGTTCTTTCTT                                          | Invitrogen        |
| M-Albumin                                                    | F-CATGACACCATGCCTGCTGAT<br>R-CTCTGATCTTCAGGAAGTGAC                                         | Invitrogen        |
| M- $\beta$ -Actin                                            | F-CTGTCCCTGTATGCCTCTG<br>R-ATGTCACGCACGATTTCC                                              | Invitrogen        |
| M-CD36                                                       | F-GATGACGTGGCAAAGAACAG<br>R-TCCTCGGGGTCCTGAGTTAT                                           | Invitrogen        |
| M-CPT1a                                                      | F-CTATGCGCTACTCGCTGAAGG<br>R-GGCTTTTCGACCCGAGAAGA                                          | Invitrogen        |
| M-ACC                                                        | F-GTCCCCAGGGATGAACCAATA<br>R-GCCATGCTCAACCAAAGTAGC                                         | Invitrogen        |
| M-FAS                                                        | F-AGAGATCCCGAGACGCTTCT<br>R-GCCTGGTAGGCATTCTGTAGT                                          | Invitrogen        |
| M-GAPDH                                                      | F-CATCACTGCCACCCAGAAGACTG<br>R-ATGCCAGTGAGCTTCCCGTTCAG                                     | Invitrogen        |
| ON-TARGETplus SMARTpool siRNA targeted against C/EBP $\beta$ | GAAAAGAGGCGUAUGUAUA;<br>GAUCAACGUGGCUGAGCG;<br>CGGUGGACAAGCUGAGCGA;<br>ACACGGGACUGACGCAACA | Horizon Discovery |

## 1.5 Biological samples

| Description | Source | Identifier |
|-------------|--------|------------|
|             |        |            |

## 1.6 Deposited data

| Name of repository | Identifier | Link |
|--------------------|------------|------|
|                    |            |      |

## 1.7 Software

| Software name | Manufacturer                 | Version |
|---------------|------------------------------|---------|
| ImageJ        | National Institute of Health | 1.51s   |

## 1.8 Other (e.g. drugs, proteins, vectors etc.)

|                                 |                        |  |
|---------------------------------|------------------------|--|
| IRAK4 inhibitor                 | Rigel Inc.             |  |
| Clodronate containing liposomes | Encapsula NanoSciences |  |
| Recombinant mouse SAA1          | R&D System             |  |

## 1.9 Please provide the details of the corresponding methods author for the manuscript:

**Xiaoxia Li:** Department of Inflammation and Immunity, Cleveland Clinic, 9500 Euclid Avenue LRI/NE40, Cleveland, OH 44195, USA, [lix@ccf.org](mailto:lix@ccf.org), Tel: 1-216-445-8706. Fax: 1-216-444-9329;

**Laura E. Nagy:** Department of Inflammation and Immunity, Cleveland Clinic, 9500 Euclid Avenue LRI/NE40, Cleveland, OH 44195, USA, [nagy13@ccf.org](mailto:nagy13@ccf.org), Tel: 1-216-444-4021, Fax: (216) 636-1493

**Jinbo Yang:** Tianyan Building/Room 237, Institute of Cancer Biology and Drug Screening, School of Life Sciences, Lanzhou University, Lanzhou, Gansu 730000, China, [yangjb@lzu.edu.cn](mailto:yangjb@lzu.edu.cn), Tel: 86-0532-85906810, Fax: 86-0532-85906810

## 2.0 Please confirm for randomised controlled trials all versions of the clinical protocol are included in the submission. These will be published online as supplementary information.

|  |
|--|
|  |
|--|
